# Supplementary material for: The cumulative impact of parity on the body mass index (BMI) in a non-selected Lower Saxony population
Source: publisher site journal article supplement (doi:10.1515/jpm-2020-0261), 2020-12-01
Supplement: Supplementary file 2 [file j_jpm-2020-0261_suppl.docx]

| Complication |  | | | | | | | |
| --- | --- | --- | --- | --- | --- | --- | --- | --- |
|  | 1 Child | | 2 Children | | 3 Children | | ≥ 4 Children | |
|  | Odds ratio | Confidence interval (95% ) | Odds ratio | Confidence interval (95% ) | Odds ratio | Confidence interval (95% ) | Odds ratio | Confidence interval (95% ) |
| Not-compliant mother | 1.11 | 0.94 – 1.31 | 1.24 | 1.07 – 1.43 | 1.3 | 1.01 – 1.68 | 1.61 | 1.17 – 2.21 |
| Uncertain delivery date | 1.13 | 1.05 – 1.22 | 1.16 | 1.08 – 1.25 | 1.2 | 1.07 – 1.34 | 1.23 | 1.08 – 1.4 |
| Abuse | 1.53 | 1.41 – 1.66 | 1.39 | 1.3 – 1.48 | 1.16 | 1.06 – 1.27 | 0.74 | 0.67 – 0.82 |
| Social issues | 0.85 | 0.73 – 0.99 | 0.82 | 0.73 – 0.94 | 1.0 | 0.86 – 1.17 | 1.05 | 0.92 – 1.21 |
| Developed psychological disturbance | 1.0 | 0.9 – 1.11 | 1.03 | 0.93 – 1.14 | 1.03 | 0.9 – 1.17 | 0.95 | 0.82 – 1.09 |
|  |  |  |  |  |  |  |  |  |
| Urinary protein excretion and edema formation | 4.58 | 4.09 – 5.13 | 5.42 | 4.75 – 6.19 | 5.41 | 4.25 – 6.89 | 8.44 | 5.61 – 12.7 |
| Gastational hypertension | 5.67 | 5.23 – 6.13 | 7.27 | 6.66 – 7.94 | 7.12 | 6.11 – 8.31 | 6.98 | 5.54 – 8.78 |
| Hypertension | 7.58 | 6.96 – 8.25 | 9.98 | 9.05 – 11.01 | 9.95 | 8.4 – 11.79 | 8.05 | 6.23 – 10.41 |
| Placental insufficiency | 1.27 | 1.17 – 1.39 | 1.02 | 0.93 – 1.11 | 1.08 | 0.94 – 1.23 | 0.88 | 0.74 – 1.04 |
| Disease needed intervention | 1.29 | 1.12 – 1.49 | 1.49 | 1.33 – 1.67 | 1.37 | 1.13 – 1.66 | 1.32 | 1.02 – 1.7 |
| Gestational Diabetes | 3.01 | 2.75 – 3.28 | 3.3 | 3.08 – 3.53 | 3.62 | 3.25 – 4.03 | 3.8 | 3.28 – 4.39 |
| Diabetes mellitus | 4.49 | 4.06 – 4.97 | 4.37 | 4.04 – 4.73 | 4.32 | 3.81 – 4.9 | 4.91 | 4.11 – 5.87 |
|  |  |  |  |  |  |  |  |  |
| Failure to progress | 1.38 | 1.31 – 1.45 | 1.48 | 1.39 – 1.58 | 1.44 | 1.24 – 1.66 | 1.46 | 1.19 – 1.8 |
| Premature rupture of membranes | 1.1 | 1.06 – 1.15 | 1.09 | 1.05 – 1.13 | 0.99 | 0.93 – 1.06 | 1.05 | 0.97 – 1.14 |
| Ceasarean Section | 2.2 | 2.12 – 2.29 | 2.26 | 2.19 – 2.32 | 2.11 | 2.0 – 2.21 | 1.65 | 1.53 – 1.77 |
| Primary C. Section | 2.09 | 1.99 – 2.2 | 2.27 | 2.18 – 2.35 | 2.12 | 1.99 – 2.25 | 1.61 | 1.47 – 1.76 |
| Secondary C. Section | 2.29 | 2.19 – 2.39 | 2.05 | 1.96 – 2.15 | 1.9 | 1.74 – 2.08 | 1.59 | 1.41 – 1.8 |
| Vacuum | 1.04 | 0.97 – 1.12 | 1.09 | 0.98 – 1.21 | 1.01 | 0.79 – 1.29 | 1.11 | 0.79 – 1.55 |
| Forceps | 1.16 | 1.0 – 1.35 | 1.09 | 0.86 – 1.37 | 1.22 | 0.75 – 2.01 | 1.07 | 0.47 – 2.43 |
| Spontanous Birth | 0.53 | 0.51 – 0.55 | 0.47 | 0.46 – 0.48 | 0.49 | 0.47 – 0.51 | 0.62 | 0.56 – 0.66 |

Supplemental Table 1: Odds ratios and confidence interval of selected maternal outcome parameters
